# Supplementary material for: Prevalence of Four Sarcopenia Criteria in Older Patients with Cancer, and Their Predictive Value for 6-Month Mortality: The NutriAgeCancer National Prospective Cohort Study
Source: MDPI journal article supplement (doi:10.3390/nu15061508), 2023-03-21
Supplement: s1 [file s1]

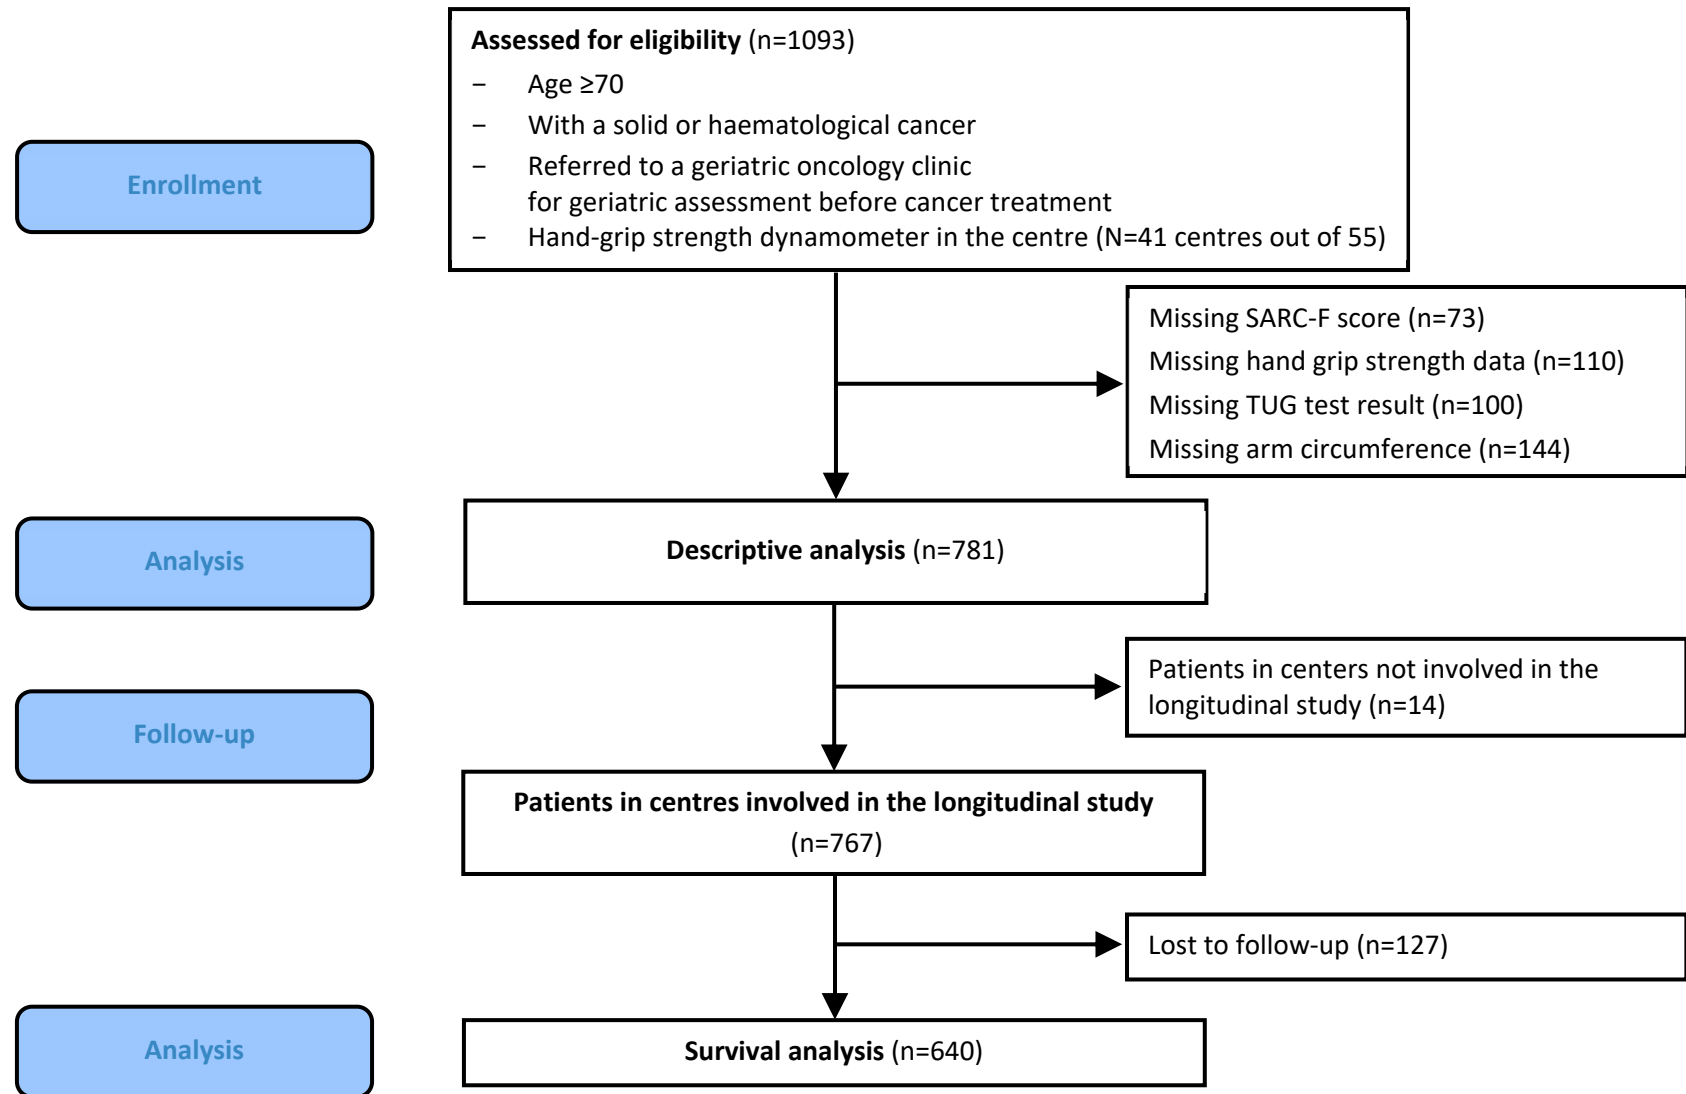

Supplementary Figure S1. Study flow chart

**Supplementary Figure S2.** Multivariate Cox analyses of the association between two composite variables for sarcopenia and 6-month mortality in patients with metastatic cancer who were able to perform the TUG test: **A.** A composite variable corresponding to the EWGSOP2 definition of sarcopenia; **B.** A composite variable that included the SARC-F in the definition.

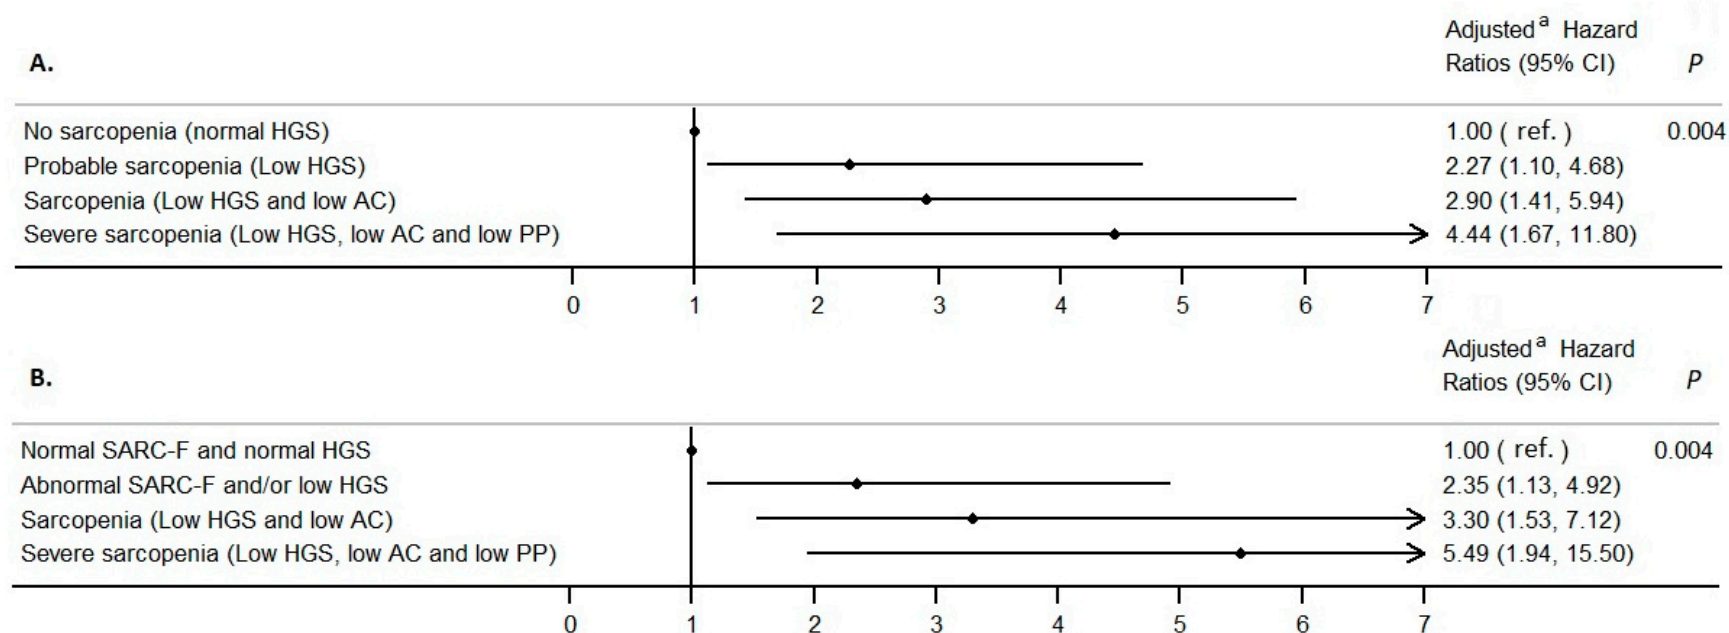

HGS, hand-grip strength; AC, arm circumference; PP, physical performance; SARC-F, strength, assistance with walking, rising from a chair, climbing stairs, and falls.

<sup>a</sup> Hazard Ratios adjusted for age, in/out patient status, cancer site, cancer treatment decision, cognitive impairment, underweight, weight loss and number of daily prescribed medications.

**Supplementary Table S1.** Multivariate Cox analyses of the association between low hand-grip strength and low arm circumference and 6-month mortality in the subpopulations defined by the EWGSOP2 algorithm, overall and by metastatic status.

|                                                             | Overall population |              |         | Non-metastatic   |         |         | Metastatic       |              |         |
|-------------------------------------------------------------|--------------------|--------------|---------|------------------|---------|---------|------------------|--------------|---------|
|                                                             | aHR                | p-value      | C-index | aHR              | p-value | C-index | aHR              | p-value      | C-index |
| <b>Patients with an abnormal SARC-F (n=223)</b>             |                    |              |         |                  |         |         |                  |              |         |
| Baseline model <sup>a</sup>                                 | –                  |              | 80.13   | –                |         | 86.14   | –                |              | 75.87   |
| Low hand-grip strength                                      | 1.16 (0.65-2.08)   | 0.61         | 80.27   | 1.01 (0.37-2.74) | 0.99    | 86.23   | 1.38 (0.61-3.12) | 0.43         | 75.76   |
| <b>Patients with an abnormal SARC-F and low HGS (n=136)</b> |                    |              |         |                  |         |         |                  |              |         |
| Baseline model                                              | –                  |              | 76.39   | –                |         | 84.33   | –                |              | 70.94   |
| Low arm circumference                                       | 2.81 (1.28-6.19)   | <b>0.010</b> | 78.72   | 3.63 (0.84-15.6) | 0.084   | 85.87   | 3.66 (1.09-12.3) | <b>0.036</b> | 77.25   |

aHR, adjusted Hazard Ratios for variables in the baseline model; SARC-F, Strength, Assistance with walking, Rising from a chair, Climbing stairs, and Falls; HGS, hand-grip strength.

<sup>a</sup> Age (≥ 85 years), cancer site, metastatic status, cancer treatment decision (curative, palliative and supportive care), underweight (BMI <22 kg/m<sup>2</sup>), more than 5% of weight loss in the previous 6 months, number of daily prescribed medications, hospitalized vs. outpatient status and cognitive impairment (Impaired MMSE score (<24) or physician-diagnosed cognitive disorder).
